# Supplementary material
Source: publisher figshare collection journal article supplement (https://rs.figshare.com/ndownloader/files/14398271)
Supplement: Supplementary file 1 [file 14398271]

## Sheet: Information and Table Legends
PROCEEDINGS OF THE ROYAL SOCIETY B
Non-native honey bees dominate the most abundant floral resources in a biodiversity hotspot
Keng-Lou James Hung1,2,, Jennifer M. Kingston1, Adrienne Lee1, David A. Holway1, Joshua R. Kohn1
1Section of Ecology, Behavior and Evolution, Division of Biological Sciences, University of California San Diego, 9500 Gilman Drive, La Jolla, CA 92093-0116, USA
2Current address: Department of Evolution, Ecology and Organismal Biology, The Ohio State University, 318 West 12th Avenue, Columbus, OH 43210, USA
Electronic Supplementary Material S1
Supplementary Information Table S1-1: Locations of study sites and their respective internal areas of contiguous, natural coastal sage scrub habitat. The data table can be found in the spreadsheet, Table S1-1.
Supplementary Information Table S1-2: Information on the plant species (n = 45) surveyed in our study. The data table, along with the footnote to the flower abundance estimation protocol column, can be found in the spreadsheet, Table S1-2.
Supplementary Information Table S1-3: Information on floral visitor species and morphogroups (n = 269) surveyed in the 11 study plots using Approach 2. Floral visitor data are only presented for Approach 2 because data collection in Approach 1 did not resolve floral visitor identity beyond whether the visitor was a honey bee or not. For each taxon, names in all uppercase letters indicate that the…
Supplementary Information Table S1-4: Outputs of supplementary analyses to assess the statistical significance and strength of the relationship between flower abundance and the numbers of each visitor type separately (i.e., honey bees, all non-honey bee insects, and individual taxonomic orders of non-honey bee insects). Models here are structured similarly to Models 1a and 1b in table 1 of the ma…
Supplementary Information Table S1-5: Raw data used in analyses. The data table can be found in the spreadsheet, Table S1-5.

## Sheet: Table S1-1
Site	Approach	Latitude	Longitude	Internal area (ha)
MTE4	Approach 1	32.835	-117.075	> 500
MTS1	Approach 2	32.792	-117.061	2.72
SWSX	Approach 2	32.786	-116.989	6.23
MTS2	Approach 2	32.856	-117.188	12.89
SWS3	Approach 2	32.72	-117.078	28.06
SWS1	Approach 2	32.75	-117.032	46.55
MTS6	Approach 2	32.722	-117.119	52.79
ECR4	Approach 2	32.893	-117.092	> 500
ECR5	Approach 2	32.9	-117.075	> 500
MTE3	Approach 2	32.822	-117.076	> 500
SWEA	Approach 2	32.732	-116.956	> 500
SWI4	Approach 2	32.727	-116.94	> 500

## Sheet: Table S1-2
Plant species	Family	Growth form	# sites Approach 1	# sites Approach 2	Max flower abundance Approach 1	Max flower abundance Approach 2	Transect- or plot-level flower abundance estimation protocol*
Calochortus splendens	Liliaceae	Small perennial herb	0	3	N/A	278	Total number of flowers
Calystegia macrostegia	Convolvulaceae	Perennial vine	0	4	N/A	111	Total number of flowers
Cylindropuntia prolifera	Cactaceae	Large cactus	0	1	N/A	45	Total number of flowers
Antirrhinum nuttallianum	Plantaginaceae	Large perennial herb	0	2	N/A	148	Flowers × individual plants
Helianthemum scoparium	Cistaceae	Large perennial herb	0	2	N/A	1200	Flowers × individual plants
Chlorogalum parviflorum	Asparagaceae	Small perennial herb	0	5	N/A	400	Flowers × patches of plants
Eriastrum filifolium	Polemoniaceae	Small annual herb	0	1	N/A	3180	Flowers × patches of plants
Erodium spp.	Geraniaceae	Small annual herb	1	4	4380	15200	Flowers × patches of plants
Navarretia hamata	Polemoniaceae	Small annual herb	0	5	N/A	28563	Flowers × patches of plants
Zeltnera venusta	Gentianaceae	Small annual herb	0	1	N/A	505	Flowers × patches of plants
Osmadenia tenella	Asteraceae	Small annual herb	0	1	N/A	7986	Capitula × patches of plants
Astragalus trichopodus	Fabaceae	Large perennial herb	1	1	1550	45500	Flowers × individual plants × patches of plants
Camissoniopsis bistorta	Onagraceae	Small annual herb	0	1	N/A	519	Flowers × individual plants × patches of plants
Eremocarpus setigerus	Euphorbiaceae	Small annual herb	0	1	N/A	3670	Flowers × individual plants × patches of plants
Phacelia cicutaria	Boraginaceae	Large annual herb	0	4	N/A	3823	Flowers × individual plants × patches of plants
Scrophularia californica	Scrophulariaceae	Large perennial herb	0	2	N/A	7137	Flowers × individual plants × patches of plants
Solanum parishii	Solanaceae	Large perennial herb	0	3	N/A	2063	Flowers × individual plants × patches of plants
Centaurea melitensis	Asteraceae	Large annual herb	1	10	375	7293	Capitula × individual plants × patches of plants
Eriophyllum confertiflorum	Asteraceae	Large perennial herb	1	3	2409	29322	Capitula × individual plants × patches of plants
Gutierrezia sarothrae	Asteraceae	Large perennial herb	0	5	N/A	266935	Capitula × individual plants × patches of plants
Stephanomeria diegensis	Asteraceae	Large perennial herb	0	5	N/A	780	Capitula × individual plants × patches of plants
Lonicera subspicata	Caprifoliaceae	Perennial shrub	0	1	N/A	80	Flowers × groups of branches × individual plants
Peritoma arborea	Cleomaceae	Perennial shrub	0	1	N/A	1156	Flowers × groups of branches × individual plants
Bahiopsis laciniata	Asteraceae	Perennial shrub	1	6	15271	324000	Capitula × groups of branches × individual plants
Encelia californica	Asteraceae	Perennial shrub	0	1	N/A	949	Capitula × groups of branches × individual plants
Isocoma menziesii	Asteraceae	Perennial shrub	0	3	N/A	7632	Capitula × groups of branches × individual plants
Malacothamnus fasciculatus	Malvaceae	Perennial shrub	0	2	N/A	1587	Flowers × individual branches × individual plants
Parkinsonia aculeata	Fabaceae	Perennial tree	0	1	N/A	101660	Flowers × individual branches × individual plants
Acourtia microcephala	Asteraceae	Large perennial herb	0	1	N/A	1870	Capitula × individual branches × individual plants
Calandrinia menziesii	Montiaceae	Small annual herb	0	1	N/A	723	Flowers × small quadrats of plants × large patches of plants
Chorizanthe fimbriata	Polygonaceae	Small annual herb	0	2	N/A	124822	Flowers × small quadrats of plants × large patches of plants
Cryptantha intermedia	Boraginaceae	Small annual herb	0	8	N/A	377040	Flowers × small quadrats of plants × large patches of plants
Gilia angelensis	Polemoniaceae	Small annual herb	0	1	N/A	1980	Flowers × small quadrats of plants × large patches of plants
Chaenactis glabriuscula	Asteraceae	Small annual herb	0	2	N/A	24320	Capitula × small quadrats of plants × large patches of plants
Deinandra fasciculata	Asteraceae	Small annual herb	1	9	1218	476000	Capitula × small quadrats of plants × large patches of plants
Acmispon glaber	Fabaceae	Large perennial herb	1	8	4007	574347	Flowers × individual branches × groups of branches × individual plants
Brassica nigra	Brassicaceae	Large annual herb	0	8	N/A	504900	Flowers × individual plants × small quadrats of plants × large patches of plants
Limonium sinuatum	Plumbaginaceae	Large perennial herb	0	1	N/A	3544909	Flowers × individual plants × small quadrats of plants × large patches of plants
Sisymbrium irio	Brassicaceae	Large annual herb	0	1	N/A	8588	Flowers × individual plants × small quadrats of plants × large patches of plants
Salvia apiana	Lamiaceae	Perennial shrub	0	2	N/A	33991	Flowers × whorls × racemes × groups of branches × individual plants
Salvia clevelandii	Lamiaceae	Perennial shrub	0	1	N/A	34661	Flowers × whorls × racemes × groups of branches × individual plants
Salvia mellifera	Lamiaceae	Perennial shrub	1	6	59708	2568119	Flowers × whorls × racemes × groups of branches × individual plants
Adenostoma fasciculatum	Rosaceae	Perennial shrub	0	3	N/A	3209866	Flowers × racemes × inflorescences × groups of branches × individual plants
Eriogonum fasciculatum	Polygonaceae	Perennial shrub	1	11	51834	4472417	Flowers × racemes × inflorescences × groups of branches × individual plants
Malosma laurina	Anacardiaceae	Perennial shrub	1	11	37865	1001583	Flowers × racemes × inflorescences × groups of branches × individual plants
* Protocols are written as components of flower abundance, in the order in which we performed estimations. For example, "Flowers × groups of branches × individual plants" means that we counted the number of flowers within 3-6 similarly sized groups of branches (with each group of branches on a different plant individual), and then the number of groups of branches within 3-6 individual plants that…

## Sheet: Table S1-3
Order	Family	Genus	Species	# individuals observed	# study plots observed
Coleoptera	Buprestidae	Acmaeodera	sp. 2	2	2
Coleoptera	Buprestidae	Acmaeodera	sp. 3	1	1
Coleoptera	Cerambycidae	Judolia	sexspilota	1	1
Coleoptera	Chrysomelidae	CLYTRINI	sp. 1	1	1
Coleoptera	Coccinellidae	Hippodamia	convergens	2	2
Coleoptera	Meloidae	Lytta	auriculata	1	1
Coleoptera	Meloidae	Lytta	nitidicollis	2	1
Coleoptera	Melyridae	Collops	sp. 1	5	2
Coleoptera	Mordellidae	Mordella	hubbsi grp. spp.	22	7
Coleoptera	Scarabaeidae	Hoplia	callipyge	5	2
Diptera	Bombyliidae	Aphoebantus	interruptus	6	3
Diptera	Bombyliidae	Aphoebantus	sp. 1	36	4
Diptera	Bombyliidae	BOMBYLIIDAE	sp. 1	1	1
Diptera	Bombyliidae	BOMBYLIIDAE	sp. 2	7	4
Diptera	Bombyliidae	BOMBYLIIDAE	sp. 7	1	1
Diptera	Bombyliidae	BOMBYLIIDAE	spp.	2	1
Diptera	Bombyliidae	Bombylius	sp. 2	18	3
Diptera	Bombyliidae	Bombylius	sp. 5	1	1
Diptera	Bombyliidae	Chrysanthrax	sp. 3	13	2
Diptera	Bombyliidae	Conophorus	atratulus	2	1
Diptera	Bombyliidae	Conophorus	sp. 1	6	1
Diptera	Bombyliidae	Conophorus	sp. 2	1	1
Diptera	Bombyliidae	Exoprosopa	sp. 1	11	4
Diptera	Bombyliidae	Exoprosopa	sp. 2	2	2
Diptera	Bombyliidae	Exoprosopa	sp. 3	1	1
Diptera	Bombyliidae	Exoprosopa	sp. 4	1	1
Diptera	Bombyliidae	Exoprosopa	sp. 5	1	1
Diptera	Bombyliidae	Geron	sp. 1	6	3
Diptera	Bombyliidae	Geron	sp. 2	1	1
Diptera	Bombyliidae	Geron	sp. 3	3	1
Diptera	Bombyliidae	Hemipenthes	lepidota	14	7
Diptera	Bombyliidae	Lordotus	cf. diplasus	12	5
Diptera	Bombyliidae	Lordotus	sp. 2	2	1
Diptera	Bombyliidae	Pantarbes	sp. 1	1	1
Diptera	Bombyliidae	Paravilla	cf. hypoxantha	5	1
Diptera	Bombyliidae	Thevenetimyia	tridentata	4	1
Diptera	Bombyliidae	Villa	lateralis grp. spp.	41	10
Diptera	Calliphoridae	Lucilia	spp.	21	10
Diptera	DIPTERA	DIPTERA	sp. 1	54	11
Diptera	DIPTERA	DIPTERA	sp. 10	4	4
Diptera	DIPTERA	DIPTERA	sp. 11	1	1
Diptera	DIPTERA	DIPTERA	sp. 2	8	4
Diptera	DIPTERA	DIPTERA	sp. 3	1	1
Diptera	DIPTERA	DIPTERA	sp. 5	2	2
Diptera	DIPTERA	DIPTERA	sp. 6	1	1
Diptera	DIPTERA	DIPTERA	sp. 8	1	1
Diptera	DIPTERA	DIPTERA	sp. 9	2	1
Diptera	DIPTERA	DIPTERA	spp.	36	10
Diptera	Sarcophagidae	Sarcophaga	sp. 1	2	2
Diptera	Sarcophagidae	SARCOPHAGIDAE	sp. 1	2	1
Diptera	Sarcophagidae	SARCOPHAGIDAE	sp. 2	1	1
Diptera	Sarcophagidae	SARCOPHAGIDAE	sp. 3	1	1
Diptera	Sarcophagidae	SARCOPHAGIDAE	spp.	10	7
Diptera	Stratiomyidae	Hedriodiscus	binotatus	1	1
Diptera	Syrphidae	Allograpta	obliqua	92	11
Diptera	Syrphidae	Copestylum	avidum	49	5
Diptera	Syrphidae	Copestylum	marginatum	26	4
Diptera	Syrphidae	Copestylum	mexicanum grp. spp.	15	6
Diptera	Syrphidae	Dioprosopa	clavata	1	1
Diptera	Syrphidae	Eristalinus	taeniops	4	3
Diptera	Syrphidae	Eupeodes	volucris	14	8
Diptera	Syrphidae	Fazia	micrura	1	1
Diptera	Syrphidae	Nausigaster	sp. 1	3	2
Diptera	Syrphidae	Paragus	haemorrhous	40	7
Diptera	Syrphidae	Platycheirus	sp. 1	1	1
Diptera	Syrphidae	Scaeva	pyrastri	2	2
Diptera	Syrphidae	Sphaerophoria	contigua	79	11
Diptera	Syrphidae	Sphaerophoria	sulphuripes	2	2
Diptera	Syrphidae	Syritta	sp. 1	3	2
Diptera	Syrphidae	Toxomerus	marginatus	107	9
Diptera	Syrphidae	Toxomerus	sp. 1	1	1
Diptera	Tachinidae	Archytas	analis grp. spp.	5	3
Diptera	Tachinidae	Chetogena	sp. 1	4	4
Diptera	Tachinidae	Cylindromyia	californica	1	1
Diptera	Tachinidae	Deopalpus	sp. 1	5	2
Diptera	Tachinidae	Eucelatoria	spp.	3	2
Diptera	Tachinidae	Peleteria	sp. 1	1	1
Diptera	Tachinidae	Peleteria	sp. 2	1	1
Diptera	Tachinidae	Stomatomyia	spp.	27	9
Diptera	Tachinidae	TACHINIDAE	sp. 1	1	1
Diptera	Tachinidae	TACHINIDAE	sp. 14	9	2
Diptera	Tachinidae	TACHINIDAE	sp. 3	1	1
Diptera	Tachinidae	TACHINIDAE	sp. 4	1	1
Diptera	Tachinidae	TACHINIDAE	sp. 5	1	1
Diptera	Tachinidae	TACHINIDAE	spp.	8	4
Diptera	Tachinidae	Trichopoda	pennipes	3	2
Diptera	Tephritidae	Trupanea	sp. 1	4	3
Hymenoptera	Apidae	Apis	mellifera	10012	11
Hymenoptera (bee)	Andrenidae	Andrena	auricoma	1	1
Hymenoptera (bee)	Andrenidae	Andrena	nr. w-scripta	2	1
Hymenoptera (bee)	Andrenidae	Andrena	sp. 5	5	1
Hymenoptera (bee)	Andrenidae	Calliopsis	pugionis	8	3
Hymenoptera (bee)	Andrenidae	Calliopsis	rhodophila	1	1
Hymenoptera (bee)	Andrenidae	Macrotera	tristella	4	2
Hymenoptera (bee)	Andrenidae	Panurginus	msn. subarmaticeps	5	3
Hymenoptera (bee)	Andrenidae	Perdita	californica	19	1
Hymenoptera (bee)	Andrenidae	Perdita	claypolei australior	108	6
Hymenoptera (bee)	Andrenidae	Perdita	fieldi	14	2
Hymenoptera (bee)	Andrenidae	Perdita	interrupta	1	1
Hymenoptera (bee)	Andrenidae	Perdita	rhois	978	11
Hymenoptera (bee)	Andrenidae	Perdita	trisignata	7	2
Hymenoptera (bee)	ANTHOPHILA	ANTHOPHILA	spp.	2	2
Hymenoptera (bee)	Apidae	Anthophora	californica	5	5
Hymenoptera (bee)	Apidae	Anthophora	curta	19	4
Hymenoptera (bee)	Apidae	Anthophora	urbana	4	2
Hymenoptera (bee)	Apidae	Anthophorula	nitens	40	3
Hymenoptera (bee)	Apidae	Anthophorula	torticornis	40	5
Hymenoptera (bee)	Apidae	Bombus	californicus	1	1
Hymenoptera (bee)	Apidae	Bombus	melanopygus	5	2
Hymenoptera (bee)	Apidae	Bombus	sonorus	7	5
Hymenoptera (bee)	Apidae	Bombus	vosnesenskii	11	3
Hymenoptera (bee)	Apidae	Ceratina	acantha	25	6
Hymenoptera (bee)	Apidae	Ceratina	arizonensis	27	4
Hymenoptera (bee)	Apidae	Ceratina	nanula	5	2
Hymenoptera (bee)	Apidae	Diadasia	australis grp. spp.	23	1
Hymenoptera (bee)	Apidae	Diadasia	laticauda	42	2
Hymenoptera (bee)	Apidae	Diadasia	nitidifrons	12	3
Hymenoptera (bee)	Apidae	Diadasia	ochracea	4	2
Hymenoptera (bee)	Apidae	Eucera	angustifrons	1	1
Hymenoptera (bee)	Apidae	Eucera	dorsata	5	3
Hymenoptera (bee)	Apidae	Eucera	tricinctella	1	1
Hymenoptera (bee)	Apidae	Habropoda	depressa	5	1
Hymenoptera (bee)	Apidae	Melissodes	communis alopex	1	1
Hymenoptera (bee)	Apidae	Melissodes	lupina	1	1
Hymenoptera (bee)	Apidae	Melissodes	montana	5	4
Hymenoptera (bee)	Apidae	Melissodes	nr. lupina	1	1
Hymenoptera (bee)	Apidae	Melissodes	tessellata	13	5
Hymenoptera (bee)	Apidae	Melissodes	velutina	1	1
Hymenoptera (bee)	Apidae	Polistes	dorsalis	2	1
Hymenoptera (bee)	Apidae	Tetraloniella	davidsoni	12	1
Hymenoptera (bee)	Apidae	Tetraloniella	pomonae	23	4
Hymenoptera (bee)	Apidae	Triepeolus	simplex grp. sp. 1	1	1
Hymenoptera (bee)	Apidae	Triepeolus	sp. 1	1	1
Hymenoptera (bee)	Apidae	Xylocopa	varipuncta	3	1
Hymenoptera (bee)	Colletidae	Colletes	slevini	9	3
Hymenoptera (bee)	Colletidae	Hylaeus	aztecus	3	3
Hymenoptera (bee)	Colletidae	Hylaeus	cookii	1	1
Hymenoptera (bee)	Colletidae	Hylaeus	episcopalis metzi	1	1
Hymenoptera (bee)	Colletidae	Hylaeus	mesillae cressoni	149	6
Hymenoptera (bee)	Colletidae	Hylaeus	polifolii	135	10
Hymenoptera (bee)	Colletidae	Hylaeus	verticalis	32	1
Hymenoptera (bee)	Halictidae	Agapostemon	texanus	52	9
Hymenoptera (bee)	Halictidae	Augochlorella	pomoniella	26	7
Hymenoptera (bee)	Halictidae	Conanthalictus	bakeri	110	4
Hymenoptera (bee)	Halictidae	Dufourea	australis	19	3
Hymenoptera (bee)	Halictidae	Dufourea	mulleri	9	2
Hymenoptera (bee)	Halictidae	Dufourea	rhamni	18	4
Hymenoptera (bee)	Halictidae	Dufourea	virgata	5	1
Hymenoptera (bee)	Halictidae	Halictus	farinosus	3	3
Hymenoptera (bee)	Halictidae	Halictus	ligatus	40	6
Hymenoptera (bee)	Halictidae	Halictus	tripartitus	86	9
Hymenoptera (bee)	Halictidae	Lasioglossum	albohirtum	1	1
Hymenoptera (bee)	Halictidae	Lasioglossum	argemonis	24	3
Hymenoptera (bee)	Halictidae	Lasioglossum	brunneiventre	6	2
Hymenoptera (bee)	Halictidae	Lasioglossum	imbrex	13	2
Hymenoptera (bee)	Halictidae	Lasioglossum	incompletum	60	10
Hymenoptera (bee)	Halictidae	Lasioglossum	mellipes	1	1
Hymenoptera (bee)	Halictidae	Lasioglossum	microlepoides	42	11
Hymenoptera (bee)	Halictidae	Lasioglossum	nevadense	20	5
Hymenoptera (bee)	Halictidae	Lasioglossum	nigrescens	19	3
Hymenoptera (bee)	Halictidae	Lasioglossum	petrellum	2	1
Hymenoptera (bee)	Halictidae	Lasioglossum	punctatoventre	17	5
Hymenoptera (bee)	Halictidae	Lasioglossum	sisymbrii	12	3
Hymenoptera (bee)	Halictidae	Lasioglossum	cf. macroprosopum	1	1
Hymenoptera (bee)	Halictidae	Lasioglossum	nr. nevadense	27	7
Hymenoptera (bee)	Halictidae	Lasioglossum	sp. 7	2	2
Hymenoptera (bee)	Halictidae	Lasioglossum	spp.	15	5
Hymenoptera (bee)	Halictidae	Micralictoides	ruficaudus	1	1
Hymenoptera (bee)	Halictidae	Sphecodes	spp.	4	4
Hymenoptera (bee)	Megachilidae	Anthidium	jocosum	8	3
Hymenoptera (bee)	Megachilidae	Anthidium	utahense	1	1
Hymenoptera (bee)	Megachilidae	Ashmeadiella	bucconis	27	4
Hymenoptera (bee)	Megachilidae	Ashmeadiella	foveata	3	2
Hymenoptera (bee)	Megachilidae	Ashmeadiella	meliloti	1	1
Hymenoptera (bee)	Megachilidae	Ashmeadiella	rufitarsis	1	1
Hymenoptera (bee)	Megachilidae	Ashmeadiella	salviae	1	1
Hymenoptera (bee)	Megachilidae	Atoposmia	copelandica	1	1
Hymenoptera (bee)	Megachilidae	Chelostoma	cockerelli	1	1
Hymenoptera (bee)	Megachilidae	Chelostoma	phaceliae	65	2
Hymenoptera (bee)	Megachilidae	Coelioxys	sp. 2	1	1
Hymenoptera (bee)	Megachilidae	Dianthidium	pudicum	8	4
Hymenoptera (bee)	Megachilidae	Heriades	occidentalis	5	4
Hymenoptera (bee)	Megachilidae	Hoplitis	fulgida platyura	2	1
Hymenoptera (bee)	Megachilidae	Hoplitis	grinnelli	20	7
Hymenoptera (bee)	Megachilidae	Hoplitis	semirubra	3	1
Hymenoptera (bee)	Megachilidae	Megachile	chilopsidis	2	1
Hymenoptera (bee)	Megachilidae	Megachile	coquilletti	2	1
Hymenoptera (bee)	Megachilidae	Megachile	fidelis	2	1
Hymenoptera (bee)	Megachilidae	Megachile	frugalis	3	1
Hymenoptera (bee)	Megachilidae	Megachile	gentilis	1	1
Hymenoptera (bee)	Megachilidae	Megachile	lippiae	3	3
Hymenoptera (bee)	Megachilidae	Megachile	occidentalis	9	2
Hymenoptera (bee)	Megachilidae	Megachile	onobrychidis	3	2
Hymenoptera (bee)	Megachilidae	Megachile	parallela	1	1
Hymenoptera (bee)	Megachilidae	Megachile	pollicaris	1	1
Hymenoptera (bee)	Megachilidae	Megachile	sp. 1	2	1
Hymenoptera (bee)	Megachilidae	Osmia	clarescens	4	2
Hymenoptera (bee)	Megachilidae	Osmia	granulosa	1	1
Hymenoptera (bee)	Melittidae	Hesperapis	fuchsi	1	1
Hymenoptera (bee)	Melittidae	Hesperapis	ilicifoliae	2	1
Hymenoptera (non-bee)	Bethylidae	BETHYLIDAE	sp. 1	1	1
Hymenoptera (non-bee)	Braconidae	BRACONIDAE	sp. 3	1	1
Hymenoptera (non-bee)	Braconidae	BRACONIDAE	sp. 4	1	1
Hymenoptera (non-bee)	Braconidae	BRACONIDAE	sp. 5	1	1
Hymenoptera (non-bee)	Braconidae	BRACONIDAE	sp. 6	1	1
Hymenoptera (non-bee)	Braconidae	BRACONIDAE	sp. 7	1	1
Hymenoptera (non-bee)	Chalcididae	CHALCIDIDAE	sp. 3	1	1
Hymenoptera (non-bee)	Chalcididae	CHALCIDIDAE	sp. 4	1	1
Hymenoptera (non-bee)	Chrysididae	CHRYSIDIDAE	sp. 1	1	1
Hymenoptera (non-bee)	Crabronidae	Cerceris	sp. 1	6	3
Hymenoptera (non-bee)	Crabronidae	CRABRONIDAE	sp. 1	1	1
Hymenoptera (non-bee)	Crabronidae	Ectemnius	sp. 1	1	1
Hymenoptera (non-bee)	Crabronidae	Eucerceris	sp. 1	1	1
Hymenoptera (non-bee)	Crabronidae	LARRINI	sp. 1	2	1
Hymenoptera (non-bee)	Crabronidae	LARRINI	sp. 2	1	1
Hymenoptera (non-bee)	Crabronidae	MISCOPHINI	sp. 1	1	1
Hymenoptera (non-bee)	Crabronidae	Oxybelus	emarginatum grp. sp. 1	2	2
Hymenoptera (non-bee)	Crabronidae	PEMPHREDONINAE	sp. 1	1	1
Hymenoptera (non-bee)	Crabronidae	PEMPHREDONINAE	sp. 2	1	1
Hymenoptera (non-bee)	Crabronidae	Philanthus	sp. 1	6	2
Hymenoptera (non-bee)	Crabronidae	Philanthus	sp. 2	8	2
Hymenoptera (non-bee)	Crabronidae	Steniolia	sp. 1	2	2
Hymenoptera (non-bee)	HYMENOPTERA	"PARASITICA"	sp. 1	1	1
Hymenoptera (non-bee)	HYMENOPTERA	"PARASITICA"	sp. 4	2	2
Hymenoptera (non-bee)	HYMENOPTERA	"PARASITICA"	sp. 8	2	2
Hymenoptera (non-bee)	HYMENOPTERA	HYMENOPTERA	spp.	2	1
Hymenoptera (non-bee)	Ichneumonidae	Compsocryptus	sp. 1	1	1
Hymenoptera (non-bee)	Myrmosidae	MYRMOSIDAE	sp. 1	1	1
Hymenoptera (non-bee)	Platygastridae	PLATYGASTRIDAE	sp. 1	1	1
Hymenoptera (non-bee)	Pompilidae	Pepsis	thisbe	5	3
Hymenoptera (non-bee)	Pompilidae	POMPILIDAE	sp. 5	1	1
Hymenoptera (non-bee)	Pompilidae	POMPILIDAE	spp.	1	1
Hymenoptera (non-bee)	Scoliidae	Campsomeris	sp. 1	3	2
Hymenoptera (non-bee)	Sphecidae	Ammophila	pruinosa	2	1
Hymenoptera (non-bee)	Sphecidae	Sceliphron	caementarium	2	2
Hymenoptera (non-bee)	Sphecidae	SPHECIDAE	sp. 1	1	1
Hymenoptera (non-bee)	Sphecidae	SPHECIDAE	sp. 2	1	1
Hymenoptera (non-bee)	Tiphiidae	Paratiphia	sp. 1	1	1
Hymenoptera (non-bee)	Tiphiidae	Paratiphia	sp. 2	6	4
Hymenoptera (non-bee)	Tiphiidae	Paratiphia	sp. 3	1	1
Hymenoptera (non-bee)	Vespidae	Ancistrocerus	sp. 1	3	3
Hymenoptera (non-bee)	Vespidae	Ancistrocerus	sp. 3	1	1
Hymenoptera (non-bee)	Vespidae	Eumenes	bollii	3	1
Hymenoptera (non-bee)	Vespidae	Eumenes	crucifera	1	1
Hymenoptera (non-bee)	Vespidae	EUMENINAE	sp. 1	2	1
Hymenoptera (non-bee)	Vespidae	EUMENINAE	sp. 4	3	1
Hymenoptera (non-bee)	Vespidae	EUMENINAE	sp. 7	2	1
Hymenoptera (non-bee)	Vespidae	Leptochilus	cf. tosquineti	2	2
Hymenoptera (non-bee)	Vespidae	Microdynerus	sp. 1	1	1
Hymenoptera (non-bee)	Vespidae	Paracistrocerus	sp. 1	14	7
Hymenoptera (non-bee)	Vespidae	Polistes	dominula	5	2
Hymenoptera (non-bee)	Vespidae	Polistes	dorsalis	6	2
Hymenoptera (non-bee)	Vespidae	Pseudomasaris	spp	7	1
Hymenoptera (non-bee)	Vespidae	Vespula	pensylvanica	3	1
Lepidoptera	Hesperiidae	Erynnis	funeralis	7	3
Lepidoptera	Hesperiidae	Ochlodes	sylvanoides	7	4
Lepidoptera	LEPIDOPTERA	LEPIDOPTERA	sp. 1	1	1
Lepidoptera	LEPIDOPTERA	LEPIDOPTERA	sp. 3	1	1
Lepidoptera	LEPIDOPTERA	LEPIDOPTERA	sp. 4	6	1
Lepidoptera	Lycaenidae	Brephidium	exilis	1	1
Lepidoptera	Lycaenidae	Leptotes	marina	1	1
Lepidoptera	Lycaenidae	Plebejus	spp.	14	4
Lepidoptera	Lycaenidae	POLYOMMATINAE	sp. 1	1	1
Lepidoptera	Lycaenidae	Strymon	melinus	19	8
Lepidoptera	Noctuidae	Schinia	sp. 1	1	1
Lepidoptera	Nymphalidae	Danaus	plexippus	1	1
Lepidoptera	Nymphalidae	Vanessa	cardui	5	4
Lepidoptera	Pieridae	Pontia	protodice	8	4
Lepidoptera	Riodinidae	Apodemia	virgulti	16	4

## Sheet: Table S1-4
Variable	Estimate	Test statistic	P-value
Model S1a (Approach 1)
Flower abundance (honey bees only)	0.0031	F1,56 = 193.26	< 0.0001
Flower abundance (non-honey bee visitors only)	0.00023	F1,57 = 25.84	< 0.0001
Model S1b (Approach 2)
Flower abundance (honey bees only)	0.00079	F1,150 = 415.25	< 0.0001
Flower abundance (non-honey bee visitors only)	6.4e-05	F1,338 = 38.00	< 0.0001
Flower abundance (Coleoptera only)	1.1e-05	F1,24 = 11.02	0.003
Flower abundance (Diptera only)	2.5e-05	F1,148 = 41.18	< 0.0001
Flower abundance (Lepidoptera only)	8.7e-06	F1,47 = 23.42	< 0.0001
Flower abundance (native bees only)	3.3e-05	F1,251 = 7.92	0.005
Flower abundance (non-bee Hymenoptera only)	1.7e-05	F1,43 = 164.16	< 0.0001

## Sheet: Table S1-5
Approach	Round	Date	Study site	Plant species	# flowers in observation patch	# flower at study site	# honey bees recorded	# non-honey bee insects recorded
1	1	2016-02-26	MTE4	Astragalus trichopodus	N/A	1425	18	1
1	1	2016-02-26	MTE4	Bahiopsis laciniata	N/A	121	2	9
1	1	2016-02-26	MTE4	Eriophyllum confertiflorum	N/A	110	0	4
1	1	2016-02-26	MTE4	Erodium spp.	N/A	72	0	4
1	2	2016-03-04	MTE4	Acmispon glaber	N/A	4007	7	1
1	2	2016-03-04	MTE4	Astragalus trichopodus	N/A	438	5	0
1	2	2016-03-04	MTE4	Bahiopsis laciniata	N/A	892	12	11
1	2	2016-03-04	MTE4	Eriogonum californica	N/A	610	3	5
1	2	2016-03-04	MTE4	Erodium spp.	N/A	781	2	9
1	2	2016-03-04	MTE4	Salvia mellifera	N/A	59708	299	7
1	3	2016-03-14	MTE4	Acmispon glaber	N/A	3046	1	3
1	3	2016-03-14	MTE4	Astragalus trichopodus	N/A	439	0	1
1	3	2016-03-14	MTE4	Bahiopsis laciniata	N/A	3413	38	5
1	3	2016-03-14	MTE4	Eriogonum californica	N/A	1625	0	4
1	3	2016-03-14	MTE4	Eriophyllum confertiflorum	N/A	465	0	1
1	3	2016-03-14	MTE4	Erodium spp.	N/A	4380	9	8
1	3	2016-03-14	MTE4	Salvia mellifera	N/A	52583	192	5
1	4	2016-03-23	MTE4	Acmispon glaber	N/A	1408	0	2
1	4	2016-03-23	MTE4	Astragalus trichopodus	N/A	150	0	2
1	4	2016-03-23	MTE4	Bahiopsis laciniata	N/A	4954	89	8
1	4	2016-03-23	MTE4	Eriogonum californica	N/A	928	0	2
1	4	2016-03-23	MTE4	Erodium spp.	N/A	736	0	6
1	4	2016-03-23	MTE4	Salvia mellifera	N/A	51976	263	9
1	5	2016-04-03	MTE4	Acmispon glaber	N/A	1479	0	3
1	5	2016-04-03	MTE4	Astragalus trichopodus	N/A	1550	0	1
1	5	2016-04-03	MTE4	Bahiopsis laciniata	N/A	15271	40	11
1	5	2016-04-03	MTE4	Centaurea melitensis	N/A	89	0	2
1	5	2016-04-03	MTE4	Eriogonum californica	N/A	1265	0	7
1	5	2016-04-03	MTE4	Eriophyllum confertiflorum	N/A	495	0	4
1	5	2016-04-03	MTE4	Salvia mellifera	N/A	39103	70	12
1	6	2016-04-15	MTE4	Acmispon glaber	N/A	1016	0	2
1	6	2016-04-15	MTE4	Bahiopsis laciniata	N/A	2474	3	12
1	6	2016-04-15	MTE4	Centaurea melitensis	N/A	350	5	2
1	6	2016-04-15	MTE4	Eriogonum californica	N/A	3907	8	8
1	6	2016-04-15	MTE4	Eriophyllum confertiflorum	N/A	1735	0	9
1	6	2016-04-15	MTE4	Erodium spp.	N/A	294	0	2
1	6	2016-04-15	MTE4	Salvia mellifera	N/A	3590	16	7
1	7	2016-04-22	MTE4	Bahiopsis laciniata	N/A	578	3	8
1	7	2016-04-22	MTE4	Centaurea melitensis	N/A	375	1	7
1	7	2016-04-22	MTE4	Deinandra fasciculata	N/A	40	0	3
1	7	2016-04-22	MTE4	Eriogonum californica	N/A	15727	16	13
1	7	2016-04-22	MTE4	Eriophyllum confertiflorum	N/A	19	1	8
1	7	2016-04-22	MTE4	Salvia mellifera	N/A	1072	8	6
1	8	2016-04-28	MTE4	Bahiopsis laciniata	N/A	80	0	2
1	8	2016-04-28	MTE4	Centaurea melitensis	N/A	304	0	12
1	8	2016-04-28	MTE4	Deinandra fasciculata	N/A	149	0	4
1	8	2016-04-28	MTE4	Eriogonum californica	N/A	35776	28	22
1	8	2016-04-28	MTE4	Erodium spp.	N/A	47	0	3
1	8	2016-04-28	MTE4	Salvia mellifera	N/A	1210	8	0
1	9	2016-05-04	MTE4	Centaurea melitensis	N/A	139	0	8
1	9	2016-05-04	MTE4	Deinandra fasciculata	N/A	213	2	2
1	9	2016-05-04	MTE4	Eriogonum californica	N/A	41240	50	6
1	9	2016-05-04	MTE4	Eriophyllum confertiflorum	N/A	2409	0	4
1	9	2016-05-04	MTE4	Salvia mellifera	N/A	1023	6	8
1	10	2016-05-11	MTE4	Acmispon glaber	N/A	366	0	2
1	10	2016-05-11	MTE4	Centaurea melitensis	N/A	105	0	2
1	10	2016-05-11	MTE4	Deinandra fasciculata	N/A	317	0	2
1	10	2016-05-11	MTE4	Eriogonum californica	N/A	51834	83	38
1	10	2016-05-11	MTE4	Eriophyllum confertiflorum	N/A	2291	0	18
1	10	2016-05-11	MTE4	Salvia mellifera	N/A	842	6	3
1	11	2016-05-20	MTE4	Deinandra fasciculata	N/A	612	0	4
1	11	2016-05-20	MTE4	Eriogonum californica	N/A	42660	120	30
1	11	2016-05-20	MTE4	Eriophyllum confertiflorum	N/A	2284	0	18
1	12	2016-06-01	MTE4	Deinandra fasciculata	N/A	1218	4	28
1	12	2016-06-01	MTE4	Eriogonum californica	N/A	30373	158	49
1	13	2016-06-03	MTE4	Deinandra fasciculata	N/A	616	2	8
1	13	2016-06-03	MTE4	Eriogonum californica	N/A	21997	104	29
1	13	2016-06-03	MTE4	Eriophyllum confertiflorum	N/A	338	0	1
1	14	2016-06-08	MTE4	Deinandra fasciculata	N/A	949	0	24
1	14	2016-06-08	MTE4	Eriogonum californica	N/A	18242	79	30
1	15	2016-06-15	MTE4	Deinandra fasciculata	N/A	676	0	2
1	15	2016-06-15	MTE4	Eriogonum californica	N/A	2672	45	11
1	15	2016-06-15	MTE4	Malosma laurina	N/A	1795	13	6
1	16	2016-06-22	MTE4	Deinandra fasciculata	N/A	143	0	7
1	16	2016-06-22	MTE4	Eriogonum californica	N/A	1087	14	13
1	16	2016-06-22	MTE4	Malosma laurina	N/A	37865	66	10
2	1	2016-04-04	ECR4	Acmispon glaber	1124	316531	18	7
2	1	2016-04-04	ECR4	Calochortus splendens	3	120	0	15
2	1	2016-04-04	ECR4	Calystegia macrostegia	2	10	0	1
2	1	2016-04-04	ECR4	Cryptantha intermedia	562	17851	5	17
2	1	2016-04-04	ECR4	Eriogonum fasciculatum	4708	69443	5	32
2	1	2016-04-04	ECR4	Salvia mellifera	4740	80580	51	14
2	1	2016-04-04	ECR4	Solanum parishii	23	1656	0	4
2	1	2016-04-04	ECR5	Acmispon glaber	450	14288	0	2
2	1	2016-04-04	ECR5	Cryptantha intermedia	358	36851	1	15
2	1	2016-04-04	ECR5	Eriogonum fasciculatum	4004	120120	0	12
2	1	2016-04-04	ECR5	Helianthemum scoparium	20	910	0	3
2	1	2016-04-04	ECR5	Salvia mellifera	2607	1036802	51	12
2	1	2016-04-05	MTE3	Acmispon glaber	479	59847	1	3
2	1	2016-04-05	MTE3	Bahiopsis laciniata	91	2085	18	8
2	1	2016-04-05	MTE3	Brassica nigra	524	17016	15	1
2	1	2016-04-05	MTE3	Calystegia macrostegia	9	18	2	0
2	1	2016-04-05	MTE3	Centaurea melitensis	27	5130	0	2
2	1	2016-04-05	MTE3	Cryptantha intermedia	288	2883	0	15
2	1	2016-04-05	MTE3	Encelia californica	47	949	3	3
2	1	2016-04-05	MTE3	Eriogonum fasciculatum	2929	73225	10	13
2	1	2016-04-05	MTE3	Malacothamnus fasciculatus	216	865	2	2
2	1	2016-04-05	MTE3	Salvia mellifera	8823	917550	92	3
2	1	2016-04-05	MTE3	Solanum parishii	58	633	5	1
2	1	2016-04-01	MTS1	Bahiopsis laciniata	51	937	38	5
2	1	2016-04-01	MTS1	Brassica nigra	1133	9633	23	6
2	1	2016-04-01	MTS1	Eriogonum fasciculatum	29693	326627	35	19
2	1	2016-04-01	MTS1	Phacelia cicutaria	177	1060	0	25
2	1	2016-04-01	MTS1	Scrophularia californica	35	650	4	5
2	1	2016-04-06	MTS2	Acmispon glaber	758	13261	21	2
2	1	2016-04-06	MTS2	Brassica nigra	684	372680	40	9
2	1	2016-04-06	MTS2	Camissoniopsis bistorta	25	519	0	7
2	1	2016-04-06	MTS2	Chaenactis glabriuscula	52	4927	3	5
2	1	2016-04-06	MTS2	Cryptantha intermedia	2261	377040	0	15
2	1	2016-04-06	MTS2	Erodium spp.	7	329	0	4
2	1	2016-04-06	MTS2	Salvia mellifera	2658	143520	71	10
2	1	2016-04-06	MTS2	Solanum parishii	30	2063	11	6
2	1	2016-04-06	MTS6	Acmispon glaber	104	728	0	1
2	1	2016-04-06	MTS6	Calochortus splendens	2	40	2	13
2	1	2016-04-06	MTS6	Cryptantha intermedia	220	1320	0	10
2	1	2016-04-06	MTS6	Deinandra fasciculata	140	2800	0	4
2	1	2016-04-06	MTS6	Eriogonum fasciculatum	13020	1780485	113	27
2	1	2016-04-06	MTS6	Eriophyllum confertiflorum	40	3490	0	2
2	1	2016-04-06	MTS6	Salvia mellifera	1393	310017	101	1
2	1	2016-03-24	SWEA	Bahiopsis laciniata	164	18089	52	2
2	1	2016-03-24	SWEA	Brassica nigra	142	29463	2	1
2	1	2016-03-24	SWEA	Cryptantha intermedia	201	4030	3	7
2	1	2016-03-24	SWEA	Eriogonum fasciculatum	703	69576	9	14
2	1	2016-03-24	SWEA	Phacelia cicutaria	166	3823	1	55
2	1	2016-03-24	SWEA	Sisymbrium irio	505	8588	0	7
2	1	2016-03-24	SWI4	Bahiopsis laciniata	265	3439	37	4
2	1	2016-03-24	SWI4	Brassica nigra	131	14373	2	2
2	1	2016-03-24	SWI4	Calandrinia menziesii	80	723	9	2
2	1	2016-03-24	SWI4	Cryptantha intermedia	567	10200	0	13
2	1	2016-03-24	SWI4	Erodium spp.	11	329	0	1
2	1	2016-03-24	SWI4	Gilia angelensis	264	1980	0	7
2	1	2016-03-24	SWI4	Phacelia cicutaria	110	1647	3	21
2	1	2016-03-24	SWI4	Scrophularia californica	79	669	17	51
2	1	2016-03-31	SWS1	Acmispon glaber	487	7310	16	4
2	1	2016-03-31	SWS1	Astragalus trichopodus	260	45500	12	1
2	1	2016-03-31	SWS1	Bahiopsis laciniata	720	324000	64	3
2	1	2016-03-31	SWS1	Brassica nigra	190	63765	24	1
2	1	2016-03-31	SWS1	Calystegia macrostegia	10	52	0	2
2	1	2016-03-31	SWS1	Centaurea melitensis	26	5319	6	0
2	1	2016-03-31	SWS1	Eriogonum fasciculatum	4738	303218	72	5
2	1	2016-03-31	SWS1	Phacelia cicutaria	199	1788	25	35
2	1	2016-03-31	SWS3	Acmispon glaber	603	50624	12	1
2	1	2016-03-31	SWS3	Bahiopsis laciniata	120	480	15	2
2	1	2016-03-31	SWS3	Brassica nigra	138	14663	39	5
2	1	2016-03-31	SWS3	Chaenactis glabriuscula	20	700	3	6
2	1	2016-03-31	SWS3	Cryptantha intermedia	497	84566	9	4
2	1	2016-03-31	SWS3	Eriophyllum confertiflorum	480	8160	0	3
2	1	2016-03-31	SWS3	Peritoma arborea	58	750	16	0
2	1	2016-03-31	SWS3	Salvia apiana	77	7283	50	0
2	1	2016-03-31	SWS3	Salvia mellifera	4598	836897	117	2
2	1	2016-04-01	SWSX	Acmispon glaber	515	12620	17	5
2	1	2016-04-01	SWSX	Brassica nigra	924	81813	36	6
2	1	2016-04-01	SWSX	Calystegia macrostegia	10	20	3	0
2	1	2016-04-01	SWSX	Erodium spp.	13	2938	0	2
2	1	2016-04-01	SWSX	Salvia clevelandii	25	175	2	3
2	2	2016-04-21	ECR4	Acmispon glaber	2611	574347	15	5
2	2	2016-04-21	ECR4	Adenostoma fasciculatum	10015	190281	1	22
2	2	2016-04-21	ECR4	Calochortus splendens	3	278	0	8
2	2	2016-04-21	ECR4	Cryptantha intermedia	340	15640	0	3
2	2	2016-04-21	ECR4	Eriogonum fasciculatum	15072	2185483	36	10
2	2	2016-04-21	ECR4	Helianthemum scoparium	98	492	0	4
2	2	2016-04-21	ECR4	Salvia mellifera	5880	99960	97	22
2	2	2016-04-21	ECR5	Acmispon glaber	370	4070	0	1
2	2	2016-04-21	ECR5	Cryptantha intermedia	182	12376	0	1
2	2	2016-04-21	ECR5	Eriogonum fasciculatum	6649	305849	40	7
2	2	2016-04-21	ECR5	Helianthemum scoparium	133	1200	1	5
2	2	2016-04-21	ECR5	Navarretia hamata	248	5215	0	4
2	2	2016-04-21	ECR5	Salvia mellifera	6420	2568119	54	3
2	2	2016-04-20	MTE3	Bahiopsis laciniata	100	4450	10	14
2	2	2016-04-20	MTE3	Brassica nigra	529	13090	48	6
2	2	2016-04-20	MTE3	Calochortus splendens	3	21	0	5
2	2	2016-04-20	MTE3	Calystegia macrostegia	10	10	1	3
2	2	2016-04-20	MTE3	Centaurea melitensis	34	7293	2	1
2	2	2016-04-20	MTE3	Eriogonum fasciculatum	12920	710600	36	13
2	2	2016-04-20	MTE3	Erodium spp.	30	855	0	1
2	2	2016-04-20	MTE3	Malacothamnus fasciculatus	187	1587	6	7
2	2	2016-04-20	MTE3	Navarretia hamata	111	333	0	9
2	2	2016-04-20	MTE3	Salvia mellifera	2333	393167	96	4
2	2	2016-04-19	MTS1	Bahiopsis laciniata	58	1618	23	11
2	2	2016-04-19	MTS1	Brassica nigra	688	49560	45	3
2	2	2016-04-19	MTS1	Eriogonum fasciculatum	6770	568661	106	15
2	2	2016-04-19	MTS1	Phacelia cicutaria	65	1170	0	23
2	2	2016-04-19	MTS1	Scrophularia californica	71	7137	9	8
2	2	2016-04-26	MTS2	Acmispon glaber	489	3423	0	6
2	2	2016-04-26	MTS2	Adenostoma fasciculatum	29999	3209866	25	4
2	2	2016-04-26	MTS2	Brassica nigra	2104	504900	28	3
2	2	2016-04-26	MTS2	Chaenactis glabriuscula	152	24320	19	8
2	2	2016-04-26	MTS2	Cryptantha intermedia	987	100700	4	8
2	2	2016-04-26	MTS2	Deinandra fasciculata	342	5472	1	5
2	2	2016-04-26	MTS2	Eriastrum filifolium	265	3180	0	5
2	2	2016-04-26	MTS2	Eriogonum fasciculatum	4536	27216	46	10
2	2	2016-04-26	MTS2	Erodium spp.	37	1591	0	4
2	2	2016-04-26	MTS2	Navarretia hamata	113	2825	0	2
2	2	2016-04-26	MTS2	Salvia apiana	202	12726	19	1
2	2	2016-04-26	MTS2	Salvia mellifera	4139	231770	137	5
2	2	2016-04-26	MTS2	Solanum parishii	28	413	0	12
2	2	2016-04-26	MTS6	Centaurea melitensis	25	956	1	4
2	2	2016-04-26	MTS6	Deinandra fasciculata	784	132496	5	13
2	2	2016-04-26	MTS6	Eriogonum fasciculatum	6978	2030634	132	10
2	2	2016-04-14	SWEA	Bahiopsis laciniata	55	1367	3	2
2	2	2016-04-14	SWEA	Brassica nigra	337	31014	8	1
2	2	2016-04-14	SWEA	Centaurea melitensis	17	714	0	5
2	2	2016-04-14	SWEA	Deinandra fasciculata	130	390	0	3
2	2	2016-04-14	SWEA	Eriogonum fasciculatum	5450	1743964	115	1
2	2	2016-04-14	SWEA	Phacelia cicutaria	234	937	0	87
2	2	2016-04-14	SWI4	Bahiopsis laciniata	55	716	7	2
2	2	2016-04-14	SWI4	Brassica nigra	795	112890	20	6
2	2	2016-04-14	SWI4	Deinandra fasciculata	180	1080	0	31
2	2	2016-04-14	SWI4	Eriogonum fasciculatum	4715	235753	35	5
2	2	2016-04-14	SWI4	Erodium spp.	19	15200	0	6
2	2	2016-04-14	SWI4	Malacothamnus fasciculatus	40	80	3	8
2	2	2016-04-14	SWI4	Scrophularia californica	91	1133	20	18
2	2	2016-04-18	SWS1	Bahiopsis laciniata	140	23345	4	5
2	2	2016-04-18	SWS1	Brassica nigra	246	26090	3	0
2	2	2016-04-18	SWS1	Centaurea melitensis	47	4634	2	0
2	2	2016-04-18	SWS1	Eriogonum fasciculatum	7020	840645	69	2
2	2	2016-04-18	SWS3	Brassica nigra	410	36370	28	0
2	2	2016-04-18	SWS3	Chaenactis glabriuscula	147	7553	5	7
2	2	2016-04-18	SWS3	Chorizanthe fimbriata	1813	56213	7	12
2	2	2016-04-18	SWS3	Eriogonum fasciculatum	10800	1409400	101	14
2	2	2016-04-18	SWS3	Eriophyllum confertiflorum	300	3750	0	2
2	2	2016-04-18	SWS3	Navarretia hamata	929	28563	0	16
2	2	2016-04-18	SWS3	Peritoma arborea	144	1156	12	0
2	2	2016-04-18	SWS3	Salvia apiana	71	33991	62	0
2	2	2016-04-18	SWS3	Salvia mellifera	1889	176611	77	1
2	2	2016-04-19	SWSX	Brassica nigra	485	95125	16	0
2	2	2016-04-19	SWSX	Calystegia macrostegia	8	8	3	2
2	2	2016-04-19	SWSX	Centaurea melitensis	41	2318	0	1
2	2	2016-04-19	SWSX	Eriogonum fasciculatum	4508	63116	29	3
2	2	2016-04-19	SWSX	Limonium sinuatum	3386	3544909	28	1
2	2	2016-04-19	SWSX	Salvia clevelandii	1371	6854	12	3
2	3	2016-05-13	ECR4	Acmispon glaber	2080	35360	2	14
2	3	2016-05-13	ECR4	Antirrhinum nuttallianum	28	148	0	1
2	3	2016-05-13	ECR4	Centaurea melitensis	42	635	5	7
2	3	2016-05-13	ECR4	Chlorogalum parviflorum	5	27	0	1
2	3	2016-05-13	ECR4	Deinandra fasciculata	1333	399333	10	2
2	3	2016-05-13	ECR4	Eriogonum fasciculatum	17189	3656936	78	10
2	3	2016-05-13	ECR4	Eriophyllum confertiflorum	193	3093	0	3
2	3	2016-05-13	ECR4	Salvia mellifera	2356	48289	96	13
2	3	2016-05-13	ECR5	Chlorogalum parviflorum	19	232	21	1
2	3	2016-05-13	ECR5	Eriogonum fasciculatum	12522	2567056	86	10
2	3	2016-05-13	ECR5	Helianthemum scoparium	59	472	0	1
2	3	2016-05-13	ECR5	Navarretia hamata	109	1851	0	7
2	3	2016-05-13	ECR5	Salvia mellifera	1687	360947	73	11
2	3	2016-05-11	MTE3	Deinandra fasciculata	43	1398	2	9
2	3	2016-05-11	MTE3	Eriogonum fasciculatum	8750	614688	74	11
2	3	2016-05-11	MTE3	Malacothamnus fasciculatus	127	697	10	21
2	3	2016-05-11	MTE3	Navarretia hamata	279	1115	0	9
2	3	2016-05-04	MTS1	Bahiopsis laciniata	25	388	12	8
2	3	2016-05-04	MTS1	Brassica nigra	563	19998	27	6
2	3	2016-05-04	MTS1	Centaurea melitensis	56	3117	6	3
2	3	2016-05-04	MTS1	Eriogonum fasciculatum	12572	2602450	125	9
2	3	2016-05-04	MTS1	Navarretia hamata	83	165	0	1
2	3	2016-05-04	MTS1	Scrophularia californica	37	5749	7	5
2	3	2016-05-12	MTS2	Adenostoma fasciculatum	4013	152507	17	3
2	3	2016-05-12	MTS2	Brassica nigra	3667	425368	55	4
2	3	2016-05-12	MTS2	Centaurea melitensis	76	4275	16	0
2	3	2016-05-12	MTS2	Chaenactis glabriuscula	117	16795	12	2
2	3	2016-05-12	MTS2	Deinandra fasciculata	1210	58685	50	5
2	3	2016-05-12	MTS2	Eriogonum fasciculatum	5947	83264	117	4
2	3	2016-05-12	MTS2	Lonicera subspicata	20	80	45	0
2	3	2016-05-12	MTS2	Navarretia hamata	166	4651	0	3
2	3	2016-05-12	MTS2	Salvia apiana	96	26592	44	0
2	3	2016-05-12	MTS2	Salvia mellifera	5148	216216	111	5
2	3	2016-05-12	MTS2	Solanum parishii	65	390	0	1
2	3	2016-05-12	MTS6	Deinandra fasciculata	767	268411	38	15
2	3	2016-05-12	MTS6	Eriogonum fasciculatum	3298	593600	148	10
2	3	2016-05-02	SWEA	Centaurea melitensis	40	1018	2	2
2	3	2016-05-02	SWEA	Deinandra fasciculata	727	2907	0	11
2	3	2016-05-02	SWEA	Eriogonum fasciculatum	7280	2904720	111	8
2	3	2016-05-02	SWI4	Brassica nigra	400	46600	4	1
2	3	2016-05-02	SWI4	Centaurea melitensis	26	2153	6	2
2	3	2016-05-02	SWI4	Deinandra fasciculata	480	52320	10	10
2	3	2016-05-02	SWI4	Eriogonum fasciculatum	6347	1347080	115	23
2	3	2016-05-02	SWI4	Malacothamnus fasciculatus	140	560	0	25
2	3	2016-05-02	SWI4	Malosma laurina	2932	84155	26	33
2	3	2016-05-02	SWI4	Scrophularia californica	81	935	19	6
2	3	2016-05-03	SWS1	Bahiopsis laciniata	53	1587	0	4
2	3	2016-05-03	SWS1	Cylindropuntia prolifera	5	45	0	14
2	3	2016-05-03	SWS1	Eriogonum fasciculatum	6825	1945125	110	5
2	3	2016-05-03	SWS1	Gutierrezia sarothrae	352	2109	0	13
2	3	2016-05-03	SWS3	Centaurea melitensis	17	357	0	1
2	3	2016-05-03	SWS3	Chorizanthe fimbriata	2310	73920	31	2
2	3	2016-05-03	SWS3	Deinandra fasciculata	767	157286	11	5
2	3	2016-05-03	SWS3	Eriogonum fasciculatum	10800	1566000	114	4
2	3	2016-05-03	SWS3	Gutierrezia sarothrae	998	36908	7	2
2	3	2016-05-03	SWS3	Osmadenia tenella	333	7986	0	1
2	3	2016-05-03	SWS3	Salvia apiana	132	7920	37	0
2	3	2016-05-04	SWSX	Brassica nigra	483	26825	36	5
2	3	2016-05-04	SWSX	Centaurea melitensis	55	1966	9	7
2	3	2016-05-04	SWSX	Eriogonum fasciculatum	4492	960094	93	6
2	3	2016-05-04	SWSX	Limonium sinuatum	1152	506690	6	0
2	3	2016-05-04	SWSX	Parkinsonia aculeata	406	35525	6	6
2	3	2016-05-04	SWSX	Salvia clevelandii	4333	34661	20	12
2	4	2016-06-07	ECR4	Adenostoma fasciculatum	953	29553	11	9
2	4	2016-06-07	ECR4	Chlorogalum parviflorum	5	38	0	1
2	4	2016-06-07	ECR4	Deinandra fasciculata	933	476000	54	6
2	4	2016-06-07	ECR4	Eriogonum fasciculatum	5444	816667	130	7
2	4	2016-06-07	ECR4	Stephanomeria diegensis	15	444	6	0
2	4	2016-06-07	ECR5	Adenostoma fasciculatum	971	34960	6	10
2	4	2016-06-07	ECR5	Chlorogalum parviflorum	15	308	16	2
2	4	2016-06-07	ECR5	Chorizanthe fimbriata	18	440	0	5
2	4	2016-06-07	ECR5	Deinandra fasciculata	660	11220	26	9
2	4	2016-06-07	ECR5	Eriogonum fasciculatum	15644	1220267	85	26
2	4	2016-06-02	MTE3	Chlorogalum parviflorum	8	103	0	7
2	4	2016-06-02	MTE3	Deinandra fasciculata	759	62627	102	23
2	4	2016-06-02	MTE3	Eriogonum fasciculatum	5556	277788	139	22
2	4	2016-06-02	MTE3	Gutierrezia sarothrae	189	568	3	4
2	4	2016-06-02	MTE3	Isocoma menziesii	34	1088	0	3
2	4	2016-06-02	MTE3	Stephanomeria diegensis	15	120	1	8
2	4	2016-06-01	MTS1	Centaurea melitensis	77	1431	0	4
2	4	2016-06-01	MTS1	Deinandra fasciculata	373	12507	51	20
2	4	2016-06-01	MTS1	Eriogonum fasciculatum	10844	2331556	115	16
2	4	2016-06-01	MTS1	Malosma laurina	1650	34650	34	37
2	4	2016-06-01	MTS1	Zeltnera venusta	34	354	2	0
2	4	2016-06-03	MTS2	Brassica nigra	394	13904	54	2
2	4	2016-06-03	MTS2	Chaenactis glabriuscula	93	3080	3	16
2	4	2016-06-03	MTS2	Deinandra fasciculata	1040	237120	57	11
2	4	2016-06-03	MTS2	Eriogonum fasciculatum	13067	1290333	163	68
2	4	2016-06-03	MTS2	Stephanomeria diegensis	14	423	18	4
2	4	2016-06-03	MTS6	Deinandra fasciculata	524	19404	3	6
2	4	2016-06-03	MTS6	Eriogonum fasciculatum	4000	624000	88	19
2	4	2016-05-19	SWEA	Brassica nigra	182	24873	14	0
2	4	2016-05-19	SWEA	Deinandra fasciculata	280	1120	0	8
2	4	2016-05-19	SWEA	Eriogonum fasciculatum	4993	1997333	92	13
2	4	2016-05-19	SWI4	Brassica nigra	189	28900	41	2
2	4	2016-05-19	SWI4	Centaurea melitensis	16	3328	9	5
2	4	2016-05-19	SWI4	Deinandra fasciculata	960	70560	51	11
2	4	2016-05-19	SWI4	Eriogonum fasciculatum	5373	4137467	97	7
2	4	2016-05-19	SWI4	Gutierrezia sarothrae	308	616	0	2
2	4	2016-05-19	SWI4	Malacothamnus fasciculatus	203	813	10	30
2	4	2016-05-19	SWI4	Malosma laurina	8417	1001583	62	98
2	4	2016-05-18	SWS1	Cylindropuntia prolifera	5	21	0	13
2	4	2016-05-18	SWS1	Eriogonum fasciculatum	7233	2072191	116	19
2	4	2016-05-18	SWS1	Gutierrezia sarothrae	436	4254	2	9
2	4	2016-05-18	SWS3	Chorizanthe fimbriata	911	124822	20	0
2	4	2016-05-18	SWS3	Deinandra fasciculata	1178	289788	39	4
2	4	2016-05-18	SWS3	Eriogonum fasciculatum	6928	1087661	117	7
2	4	2016-05-18	SWS3	Gutierrezia sarothrae	325	33788	39	3
2	4	2016-05-18	SWS3	Osmadenia tenella	35	841	0	2
2	4	2016-05-18	SWS3	Stephanomeria diegensis	5	79	0	5
2	4	2016-06-01	SWSX	Eriogonum fasciculatum	7517	4472417	128	6
2	4	2016-06-01	SWSX	Parkinsonia aculeata	213	29394	23	10
2	4	2016-06-01	SWSX	Salvia clevelandii	277	3872	31	5
2	5	2016-06-23	ECR4	Adenostoma fasciculatum	2697	80907	1	0
2	5	2016-06-23	ECR4	Deinandra fasciculata	840	47460	54	2
2	5	2016-06-23	ECR4	Eriogonum fasciculatum	4632	277911	91	3
2	5	2016-06-23	ECR4	Malosma laurina	2890	317900	14	8
2	5	2016-06-23	ECR4	Stephanomeria diegensis	5	121	0	1
2	5	2016-06-23	ECR5	Adenostoma fasciculatum	2106	130593	5	5
2	5	2016-06-23	ECR5	Chlorogalum parviflorum	15	163	4	0
2	5	2016-06-23	ECR5	Deinandra fasciculata	424	7632	13	5
2	5	2016-06-23	ECR5	Eriogonum fasciculatum	3609	241796	33	14
2	5	2016-06-23	ECR5	Malosma laurina	2500	175000	30	11
2	5	2016-06-20	MTE3	Chlorogalum parviflorum	8	46	1	2
2	5	2016-06-20	MTE3	Deinandra fasciculata	561	47648	2	18
2	5	2016-06-20	MTE3	Eriogonum fasciculatum	1662	50282	29	8
2	5	2016-06-20	MTE3	Gutierrezia sarothrae	261	2483	0	5
2	5	2016-06-20	MTE3	Isocoma menziesii	29	2581	0	4
2	5	2016-06-20	MTE3	Malosma laurina	700	8750	28	2
2	5	2016-06-20	MTE3	Stephanomeria diegensis	15	17	0	4
2	5	2016-06-16	MTS1	Centaurea melitensis	50	906	27	3
2	5	2016-06-16	MTS1	Deinandra fasciculata	743	72847	42	7
2	5	2016-06-16	MTS1	Eriogonum fasciculatum	5855	427401	112	22
2	5	2016-06-16	MTS1	Malosma laurina	2347	293333	43	154
2	5	2016-06-16	MTS1	Zeltnera venusta	20	505	0	7
2	5	2016-06-22	MTS2	Deinandra fasciculata	1047	119371	33	14
2	5	2016-06-22	MTS2	Eriogonum fasciculatum	1454	59996	109	39
2	5	2016-06-22	MTS2	Stephanomeria diegensis	12	178	0	2
2	5	2016-06-22	MTS6	Eriogonum fasciculatum	1422	90667	47	13
2	5	2016-06-22	MTS6	Malosma laurina	1516	19702	36	41
2	5	2016-06-08	SWEA	Chlorogalum parviflorum	12	125	0	5
2	5	2016-06-08	SWEA	Eriogonum fasciculatum	5000	152500	58	30
2	5	2016-06-08	SWEA	Malosma laurina	747	30613	15	67
2	5	2016-06-08	SWI4	Acourtia microcephala	220	1870	16	13
2	5	2016-06-08	SWI4	Antirrhinum nuttallianum	33	114	0	1
2	5	2016-06-08	SWI4	Deinandra fasciculata	723	29657	18	8
2	5	2016-06-08	SWI4	Eremocarpus setigerus	51	1900	0	2
2	5	2016-06-08	SWI4	Eriogonum fasciculatum	2639	1496250	114	7
2	5	2016-06-08	SWI4	Gutierrezia sarothrae	482	1688	8	5
2	5	2016-06-08	SWI4	Malosma laurina	838	271440	52	47
2	5	2016-06-15	SWS1	Chlorogalum parviflorum	10	61	0	9
2	5	2016-06-15	SWS1	Eriogonum fasciculatum	4055	545373	118	6
2	5	2016-06-15	SWS1	Gutierrezia sarothrae	511	22106	15	4
2	5	2016-06-15	SWS1	Malosma laurina	2320	164720	38	144
2	5	2016-06-15	SWS3	Deinandra fasciculata	584	17965	23	5
2	5	2016-06-15	SWS3	Eriogonum fasciculatum	1849	23111	81	4
2	5	2016-06-15	SWS3	Gutierrezia sarothrae	328	266935	63	0
2	5	2016-06-15	SWS3	Isocoma menziesii	15	58	0	3
2	5	2016-06-15	SWS3	Stephanomeria diegensis	4	64	0	1
2	5	2016-06-16	SWSX	Eriogonum fasciculatum	6548	785778	108	11
2	5	2016-06-16	SWSX	Malosma laurina	1373	109867	111	12
2	5	2016-06-16	SWSX	Parkinsonia aculeata	399	101660	60	5
2	6	2016-07-14	ECR4	Adenostoma fasciculatum	3211	35317	8	15
2	6	2016-07-14	ECR4	Eriogonum fasciculatum	159	5406	68	10
2	6	2016-07-14	ECR4	Stephanomeria diegensis	9	325	22	13
2	6	2016-07-14	ECR5	Malosma laurina	2363	35450	56	66
2	6	2016-07-12	MTE3	Gutierrezia sarothrae	419	2934	3	12
2	6	2016-07-12	MTE3	Isocoma menziesii	36	7632	4	7
2	6	2016-07-12	MTE3	Malosma laurina	1417	73667	26	3
2	6	2016-07-12	MTE3	Stephanomeria diegensis	6	36	0	5
2	6	2016-07-12	MTS1	Deinandra fasciculata	303	10920	64	23
2	6	2016-07-12	MTS1	Eriogonum fasciculatum	60	1267	31	8
2	6	2016-07-12	MTS1	Gutierrezia sarothrae	960	3358	8	4
2	6	2016-07-12	MTS1	Malosma laurina	4993	324567	38	6
2	6	2016-07-13	MTS2	Eriogonum fasciculatum	728	25116	98	14
2	6	2016-06-30	MTS2	Malosma laurina	2050	55350	68	56
2	6	2016-07-13	MTS2	Malosma laurina	1393	15327	72	125
2	6	2016-07-13	MTS2	Stephanomeria diegensis	6	780	7	11
2	6	2016-07-13	MTS6	Isocoma menziesii	29	961	0	14
2	6	2016-06-28	SWEA	Chlorogalum parviflorum	8	400	0	2
2	6	2016-06-28	SWEA	Eriogonum fasciculatum	1189	24083	37	23
2	6	2016-06-28	SWEA	Malosma laurina	1653	44640	16	42
2	6	2016-06-28	SWI4	Eremocarpus setigerus	60	3670	0	3
2	6	2016-06-28	SWI4	Eriogonum fasciculatum	1883	138841	63	8
2	6	2016-06-28	SWI4	Gutierrezia sarothrae	109	681	0	2
2	6	2016-06-28	SWI4	Malosma laurina	2067	133300	83	18
2	6	2016-06-28	SWI4	Stephanomeria diegensis	5	52	2	0
2	6	2016-06-29	SWS1	Chlorogalum parviflorum	6	86	2	3
2	6	2016-06-29	SWS1	Eriogonum fasciculatum	450	20830	63	30
2	6	2016-06-29	SWS1	Gutierrezia sarothrae	196	7578	6	13
2	6	2016-06-29	SWS1	Malosma laurina	751	44316	52	135
2	6	2016-06-29	SWS3	Eriogonum fasciculatum	480	4560	16	10
2	6	2016-06-29	SWS3	Gutierrezia sarothrae	168	58764	14	2
2	6	2016-06-29	SWS3	Isocoma menziesii	29	159	0	1
2	6	2016-06-29	SWS3	Malosma laurina	1804	42404	32	28
2	6	2016-06-29	SWS3	Stephanomeria diegensis	4	180	0	11
2	6	2016-06-29	SWSX	Eriogonum fasciculatum	591	50836	61	12
2	6	2016-06-29	SWSX	Malosma laurina	1636	210169	83	27
2	6	2016-06-29	SWSX	Parkinsonia aculeata	169	21632	13	1
